# Supplementary material
Source: PubMed Central journal article supplement (PMC3401400)

## Smoking Cessation and Body Weight: Evidence from the Behavioral Risk Factor Surveillance Survey

Panagiotis Kasteridis and Steven T. Yen

Online Tables (Variable Definitions, Treatment Effects, Marginal Effects) and Figures (Treatment Effects by Gender and Age Groups)

Table A1: Variable Definitions and Sample Statistics: Females

| <i>Variable</i>                  | <i>Definition</i>                                                                              | <i>Age 18–40</i>                       |                                        | <i>Age 41–55</i>                       |                                        | <i>Age 56–64</i>                       |                                        |
|----------------------------------|------------------------------------------------------------------------------------------------|----------------------------------------|----------------------------------------|----------------------------------------|----------------------------------------|----------------------------------------|----------------------------------------|
|                                  |                                                                                                | <i>Smokers</i>                         | <i>Quitters</i>                        | <i>Smokers</i>                         | <i>Quitters</i>                        | <i>Smokers</i>                         | <i>Quitters</i>                        |
| Endogenous variable              |                                                                                                |                                        |                                        |                                        |                                        |                                        |                                        |
| BMI                              | Body mass index: (weight in kilogram)<br>÷ (height in meters) <sup>2</sup> = kg/m <sup>2</sup> | 26.82<br>(6.48)<br>[8.16]<br>{69.20}   | 26.90<br>(6.55)<br>[12.83]<br>{67.81}  | 27.11<br>(6.41)<br>[7.40]<br>{69.11}   | 28.03<br>(6.80)<br>[8.88]<br>{69.88}   | 26.78<br>(5.94)<br>[9.90]<br>{67.72}   | 28.60<br>(6.65)<br>[11.32]<br>{67.82}  |
| Continuous explanatory variables |                                                                                                |                                        |                                        |                                        |                                        |                                        |                                        |
| Age                              | Age in years                                                                                   | 31.42<br>(5.97)                        | 32.86<br>(5.27)                        | 48.14<br>(4.19)                        | 48.82<br>(4.18)                        | 59.65<br>(2.53)                        | 60.01<br>(2.55)                        |
| Income                           | Annual household income in \$1,000                                                             | 40.80<br>(34.29)<br>[5.00]<br>{124.04} | 60.74<br>(41.36)<br>[5.00]<br>{124.04} | 45.65<br>(38.01)<br>[5.00]<br>{124.04} | 67.86<br>(43.25)<br>[5.00]<br>{124.04} | 39.36<br>(34.14)<br>[5.00]<br>{124.04} | 57.68<br>(41.50)<br>[5.00]<br>{124.04} |
| Adults                           | Number of adult(s) in household                                                                | 1.87<br>(0.80)<br>[1.00]<br>{14.00}    | 1.89<br>(0.65)<br>[1.00]<br>{8.00}     | 1.87<br>(0.83)<br>[1.00]<br>{13.00}    | 1.94<br>(0.80)<br>[1.00]<br>{8.00}     | 1.65<br>(0.73)<br>[1.00]<br>{17.00}    | 1.74<br>(0.69)<br>[1.00]<br>{12.00}    |
| Children                         | Number of child(ren) in household                                                              | 1.57<br>(1.30)<br>[0.00]<br>{16.00}    | 1.61<br>(1.24)<br>[0.00]<br>{11.00}    | 0.60<br>(0.96)<br>[0.00]<br>{14.00}    | 0.69<br>(1.00)<br>[0.00]<br>{12.00}    | 0.14<br>(0.56)<br>[0.00]<br>{16.00}    | 0.10<br>(0.45)<br>[0.00]<br>{9.00}     |
| Tax rate                         | State cigarette tax rate (in \$) per pack of<br>20 cigarettes                                  | 0.97<br>(0.69)<br>[0.03]<br>{3.46}     | 1.10<br>(0.73)<br>[0.03]<br>{3.46}     | 1.03<br>(0.72)<br>[0.03]<br>{3.46}     | 1.15<br>(0.76)<br>[0.03]<br>{3.46}     | 1.05<br>(0.73)<br>[0.03]<br>{3.46}     | 1.17<br>(0.76)<br>[0.03]<br>{3.46}     |

Binary explanatory variables (yes = 1; no = 0)

|                  |                                         |        |        |        |        |        |        |
|------------------|-----------------------------------------|--------|--------|--------|--------|--------|--------|
| Health excellent | Excellent health, self-reported         | 0.15   | 0.26   | 0.11   | 0.22   | 0.10   | 0.18   |
| Health very good | Very good health                        | 0.35   | 0.40   | 0.29   | 0.36   | 0.26   | 0.32   |
| Health good      | Good health (reference)                 | 0.35   | 0.25   | 0.32   | 0.26   | 0.31   | 0.28   |
| Health fair-poor | Fair or poor health                     | 0.16   | 0.08   | 0.27   | 0.16   | 0.33   | 0.22   |
| White            | Race is white                           | 0.77   | 0.82   | 0.79   | 0.85   | 0.82   | 0.86   |
| Other race       | Other race                              | 0.14   | 0.14   | 0.11   | 0.09   | 0.09   | 0.07   |
| Black            | Black (reference)                       | 0.09   | 0.05   | 0.10   | 0.07   | 0.09   | 0.07   |
| ≤ High school    | High school graduate or less            | 0.49   | 0.29   | 0.50   | 0.32   | 0.51   | 0.35   |
| Some college     | Some college or technical school (ref.) | 0.34   | 0.34   | 0.32   | 0.32   | 0.30   | 0.30   |
| College graduate | College graduate or more                | 0.18   | 0.38   | 0.18   | 0.37   | 0.18   | 0.35   |
| Married          | Married                                 | 0.42   | 0.63   | 0.47   | 0.62   | 0.40   | 0.55   |
| Employed         | Employed for wages or self-employed     | 0.64   | 0.69   | 0.64   | 0.75   | 0.48   | 0.54   |
| Health coverage  | Has health insurance                    | 0.74   | 0.85   | 0.78   | 0.89   | 0.81   | 0.90   |
| Diabetes         | Diagnosed with diabetes                 | 0.03   | 0.03   | 0.08   | 0.08   | 0.14   | 0.15   |
| Year 2004        | Survey year 2004 (reference)            | 0.32   | 0.28   | 0.25   | 0.24   | 0.21   | 0.19   |
| Year 2005        | Survey year 2005                        | 0.33   | 0.32   | 0.30   | 0.29   | 0.26   | 0.26   |
| Year 2009        | Survey year 2009                        | 0.23   | 0.28   | 0.30   | 0.32   | 0.35   | 0.37   |
| Year 2010        | Survey year 2010                        | 0.11   | 0.13   | 0.15   | 0.15   | 0.18   | 0.19   |
| South Atlantic   | Resides in South Atlantic division      | 0.17   | 0.15   | 0.17   | 0.16   | 0.17   | 0.17   |
| E. So. Central   | Resides in East South Central division  | 0.10   | 0.06   | 0.10   | 0.06   | 0.10   | 0.07   |
| W. So. Central   | Resides in West South Central division  | 0.09   | 0.07   | 0.09   | 0.07   | 0.09   | 0.07   |
| New England      | Resides in New England division         | 0.10   | 0.14   | 0.10   | 0.15   | 0.10   | 0.14   |
| Mid. Atlantic    | Resides in Middle Atlantic division     | 0.08   | 0.09   | 0.08   | 0.09   | 0.08   | 0.08   |
| E. No. Central   | Resides in East North Central division  | 0.11   | 0.09   | 0.11   | 0.09   | 0.10   | 0.09   |
| W. No. Central   | Resides in West North Central division  | 0.13   | 0.13   | 0.13   | 0.13   | 0.13   | 0.12   |
| Mountain         | Resides in Mountain division            | 0.11   | 0.13   | 0.12   | 0.12   | 0.12   | 0.12   |
| Pacific          | Resides Pacific division (ref.)         | 0.10   | 0.14   | 0.10   | 0.13   | 0.11   | 0.13   |
| Sample size      |                                         | 33,933 | 21,884 | 41,597 | 42,150 | 18,634 | 32,851 |

*Note:* Standard deviations in parentheses, minima in brackets, and maxima in braces. Sample means of state dummy variables available online.

Table A2: Variable Definitions and Sample Statistics: Males

| <i>Variable</i>                                | <i>Definition</i>                                                                              | <i>Age 18–40</i>                       |                                        | <i>Age 41–55</i>                       |                                        | <i>Age 56–64</i>                       |                                        |
|------------------------------------------------|------------------------------------------------------------------------------------------------|----------------------------------------|----------------------------------------|----------------------------------------|----------------------------------------|----------------------------------------|----------------------------------------|
|                                                |                                                                                                | <i>Smokers</i>                         | <i>Quitters</i>                        | <i>Smokers</i>                         | <i>Quitters</i>                        | <i>Smokers</i>                         | <i>Quitters</i>                        |
| Endogenous variable                            |                                                                                                |                                        |                                        |                                        |                                        |                                        |                                        |
| BMI                                            | Body mass index: (weight in kilogram)<br>÷ (height in meters) <sup>2</sup> = kg/m <sup>2</sup> | 26.99<br>(5.24)<br>[10.36]<br>{68.52}  | 28.00<br>(5.16)<br>[10.52]<br>{69.60}  | 27.55<br>(5.17)<br>[11.29]<br>{69.02}  | 29.05<br>(5.26)<br>[6.43]<br>{69.88}   | 27.23<br>(4.97)<br>(10.65)<br>{66.65}  | 29.07<br>(5.08)<br>[11.77]<br>{68.17}  |
| Continuous explanatory variables               |                                                                                                |                                        |                                        |                                        |                                        |                                        |                                        |
| Age                                            | Age in years                                                                                   | 30.98<br>(6.16)                        | 32.82<br>(5.36)                        | 48.39<br>(4.19)                        | 49.14<br>(4.20)                        | 59.63<br>(2.52)                        | 60.06<br>(2.54)                        |
| Income                                         | Annual household income in \$1,000                                                             | 47.87<br>(36.83)<br>[5.00]<br>{124.04} | 65.53<br>(41.55)<br>[5.00]<br>{124.04} | 50.15<br>(39.25)<br>[5.00]<br>{124.04} | 71.17<br>(43.07)<br>[5.00]<br>{124.04} | 47.47<br>(38.21)<br>[5.00]<br>{124.04} | 66.69<br>(42.52)<br>[5.00]<br>{124.04} |
| Adults                                         | Number of adult(s) in household                                                                | 2.09<br>(0.90)<br>[1.00]<br>{13.00}    | 2.00<br>(0.70)<br>[1.00]<br>{12.00}    | 1.86<br>(0.84)<br>[1.00]<br>{9.00}     | 1.99<br>(0.79)<br>[1.00]<br>{16.00}    | 1.76<br>(0.76)<br>[1.00]<br>{8.00}     | 1.90<br>(0.69)<br>[1.00]<br>{10.00}    |
| Children                                       | Number of child(ren) in household                                                              | 1.12<br>(1.29)<br>[0.00]<br>{20.00}    | 1.31<br>(1.27)<br>[0.00]<br>{13.00}    | 0.58<br>(1.00)<br>[0.00]<br>{13.00}    | 0.72<br>(1.06)<br>[0.00]<br>{10.00}    | 0.14<br>(0.52)<br>[0.00]<br>{12.00}    | 0.14<br>(0.51)<br>[0.00]<br>{18.00}    |
| Tax rate                                       | State cigarette tax rate (in \$) per pack of<br>20 cigarettes                                  | 0.97<br>(0.68)<br>[0.03]<br>{3.46}     | 1.06<br>(0.71)<br>[0.03]<br>{3.46}     | 1.02<br>(0.71)<br>[0.03]<br>{3.46}     | 1.11<br>(0.74)<br>[0.03]<br>{3.46}     | 1.06<br>(0.72)<br>[0.03]<br>{3.46}     | 1.13<br>(0.74)<br>[0.03]<br>{3.46}     |
| Binary explanatory variables (yes = 1; no = 0) |                                                                                                |                                        |                                        |                                        |                                        |                                        |                                        |
| Health excellent                               | Excellent health, self-reported                                                                | 0.17                                   | 0.25                                   | 0.11                                   | 0.18                                   | 0.09                                   | 0.16                                   |
| Health very good                               | Very good health                                                                               | 0.35                                   | 0.40                                   | 0.29                                   | 0.35                                   | 0.24                                   | 0.31                                   |
| Health good                                    | Good health (reference)                                                                        | 0.35                                   | 0.28                                   | 0.35                                   | 0.31                                   | 0.34                                   | 0.31                                   |
| Health fair-poor                               | Fair or poor health                                                                            | 0.13                                   | 0.08                                   | 0.25                                   | 0.15                                   | 0.33                                   | 0.22                                   |
| White                                          | Race is white                                                                                  | 0.74                                   | 0.79                                   | 0.79                                   | 0.84                                   | 0.82                                   | 0.87                                   |

|                  |                                         |        |        |        |        |        |        |
|------------------|-----------------------------------------|--------|--------|--------|--------|--------|--------|
| Other race       | Other race                              | 0.18   | 0.17   | 0.13   | 0.11   | 0.10   | 0.08   |
| Black            | Black (reference)                       | 0.07   | 0.03   | 0.09   | 0.05   | 0.08   | 0.05   |
| ≤ High school    | High school graduate or less            | 0.56   | 0.38   | 0.53   | 0.39   | 0.48   | 0.35   |
| Some college     | Some college or technical school (ref.) | 0.27   | 0.29   | 0.29   | 0.28   | 0.29   | 0.27   |
| College graduate | College graduate or more                | 0.17   | 0.34   | 0.18   | 0.33   | 0.23   | 0.38   |
| Married          | Married                                 | 0.43   | 0.65   | 0.49   | 0.68   | 0.52   | 0.72   |
| Employed         | Employed for wages or self-employed     | 0.79   | 0.88   | 0.72   | 0.82   | 0.50   | 0.57   |
| Health coverage  | Has health insurance                    | 0.67   | 0.82   | 0.76   | 0.88   | 0.82   | 0.91   |
| Diabetes         | Diagnosed with diabetes                 | 0.03   | 0.03   | 0.08   | 0.10   | 0.15   | 0.18   |
| Year 2004        | Survey year 2004 (reference)            | 0.34   | 0.28   | 0.27   | 0.25   | 0.21   | 0.20   |
| Year 2005        | Survey year 2005                        | 0.32   | 0.31   | 0.31   | 0.29   | 0.27   | 0.26   |
| Year 2009        | Survey year 2009                        | 0.23   | 0.28   | 0.29   | 0.31   | 0.34   | 0.36   |
| Year 2010        | Survey year 2010                        | 0.11   | 0.13   | 0.14   | 0.15   | 0.18   | 0.18   |
| South Atlantic   | Resides in South Atlantic division      | 0.17   | 0.16   | 0.17   | 0.16   | 0.17   | 0.16   |
| E. So. Central   | Resides in East South Central division  | 0.08   | 0.06   | 0.09   | 0.07   | 0.08   | 0.07   |
| W. So. Central   | Resides in West South Central division  | 0.09   | 0.08   | 0.08   | 0.07   | 0.09   | 0.08   |
| New England      | Resides in New England division         | 0.10   | 0.12   | 0.10   | 0.13   | 0.10   | 0.12   |
| Mid. Atlantic    | Resides in Middle Atlantic division     | 0.08   | 0.08   | 0.08   | 0.08   | 0.07   | 0.07   |
| E. No. Central   | Resides in East North Central division  | 0.11   | 0.09   | 0.11   | 0.09   | 0.10   | 0.09   |
| W. No. Central   | Resides in West North Central division  | 0.13   | 0.13   | 0.14   | 0.14   | 0.15   | 0.14   |
| Mountain         | Resides in Mountain division            | 0.13   | 0.15   | 0.12   | 0.13   | 0.13   | 0.14   |
| Pacific          | Resides Pacific division (ref.)         | 0.12   | 0.14   | 0.11   | 0.13   | 0.11   | 0.13   |
| Sample size      |                                         | 25,734 | 17,713 | 30,258 | 35,561 | 14,770 | 33,915 |

*Note:* Standard deviations in parentheses, minima in brackets, and maxima in braces. Sample means of state dummy variables available online.

Table A3: Treatment Effect Estimates of Quitting Smoking on BMI: Females (across BMI Categories and with Observed Differences)

| <i>Sample</i> | <i>Sample size</i> | <i>Time since quitting smoking</i> |                   |                   |                       |                   |                    |                   |
|---------------|--------------------|------------------------------------|-------------------|-------------------|-----------------------|-------------------|--------------------|-------------------|
|               |                    | <i>&lt; 1 mo.</i>                  | <i>1 – 3 mos.</i> | <i>3 – 6 mos.</i> | <i>6 mos. – 1 yr.</i> | <i>1 – 5 yrs.</i> | <i>5 – 10 yrs.</i> | <i>≥ 10 yrs.</i>  |
| Females 18–40 | 55,817             | 0.62**<br>(0.28)                   | 0.52**<br>(0.25)  | 1.40***<br>(0.27) | 1.37***<br>(0.21)     | 0.87***<br>(0.10) | 0.80***<br>(0.12)  | 0.62***<br>(0.11) |
| Obs. diff.    |                    | 0.61*<br>(0.32)                    | 0.33<br>(0.29)    | 1.39***<br>(0.28) | 1.26***<br>(0.22)     | 0.48***<br>(0.11) | 0.22*<br>(0.13)    | –0.12<br>(0.11)   |
| Normal        | 26,312             | 0.60**<br>(0.27)                   | 0.50**<br>(0.25)  | 1.37***<br>(0.26) | 1.34***<br>(0.20)     | 0.85***<br>(0.10) | 0.78***<br>(0.11)  | 0.60***<br>(0.10) |
| Obs. diff.    |                    | 0.30**<br>(0.14)                   | 0.12<br>(0.14)    | 0.18<br>(0.13)    | 0.25**<br>(0.10)      | 0.21***<br>(0.05) | 0.22***<br>(0.06)  | 0.28***<br>(0.05) |
| Overweight    | 15,058             | 0.62**<br>(0.28)                   | 0.52**<br>(0.25)  | 1.40***<br>(0.27) | 1.38***<br>(0.21)     | 0.87***<br>(0.10) | 0.80***<br>(0.12)  | 0.62***<br>(0.11) |
| Obs. diff.    |                    | –0.15<br>(0.14)                    | –0.01<br>(0.11)   | 0.10<br>(0.12)    | –0.02<br>(0.09)       | –0.04<br>(0.04)   | 0.02<br>(0.06)     | 0.00<br>(0.05)    |
| Obese I       | 8,142              | 0.63**<br>(0.29)                   | 0.53**<br>(0.26)  | 1.44***<br>(0.28) | 1.41***<br>(0.21)     | 0.89***<br>(0.10) | 0.82***<br>(0.12)  | 0.63***<br>(0.11) |
| Obs. diff.    |                    | –0.03<br>(0.18)                    | 0.19<br>(0.17)    | –0.22<br>(0.16)   | 0.14<br>(0.12)        | –0.02<br>(0.06)   | 0.09<br>(0.07)     | –0.17<br>(0.07)   |
| Obese II      | 6,305              | 0.66**<br>(0.30)                   | 0.55**<br>(0.27)  | 1.49***<br>(0.28) | 1.46***<br>(0.22)     | 0.93***<br>(0.10) | 0.85***<br>(0.12)  | 0.66***<br>(0.11) |
| Obs. diff.    |                    | 1.47**<br>(0.70)                   | 1.00<br>(0.70)    | 0.46<br>(0.53)    | 0.68<br>(0.43)        | 0.22<br>(0.23)    | –0.46<br>(0.30)    | 0.90***<br>(0.28) |
| Obese I & II  | 14,447             | 0.64**<br>(0.29)                   | 0.54**<br>(0.26)  | 1.46***<br>(0.28) | 1.43***<br>(0.22)     | 0.91***<br>(0.10) | 0.84***<br>(0.12)  | 0.64***<br>(0.11) |
| Obs. diff.    |                    | 0.78<br>(0.50)                     | 0.56<br>(0.49)    | 0.84**<br>(0.41)  | 1.08***<br>(0.32)     | 0.33**<br>(0.17)  | –0.16<br>(0.21)    | 0.20<br>(0.20)    |
| Females 41–55 | 83,747             | 1.19***<br>(0.26)                  | 1.25***<br>(0.25) | 1.32***<br>(0.24) | 1.43***<br>(0.20)     | 1.96***<br>(0.10) | 2.21***<br>(0.10)  | 1.88***<br>(0.06) |

|               |        |            |         |         |         |         |         |         |         |
|---------------|--------|------------|---------|---------|---------|---------|---------|---------|---------|
|               |        | Obs. diff. | 0.62**  | 0.81*** | 0.53**  | 0.91*** | 1.24*** | 1.30*** | 1.24*** |
|               |        |            | (0.30)  | (0.29)  | (0.28)  | (0.22)  | (0.11)  | (0.12)  | (0.06)  |
| Normal        | 34,272 |            | 1.16*** | 1.22*** | 1.28*** | 1.39*** | 1.90*** | 2.15*** | 1.83*** |
|               |        |            | (0.25)  | (0.25)  | (0.24)  | (0.20)  | (0.10)  | (0.10)  | (0.06)  |
|               |        | Obs. diff. | -0.09   | 0.08    | -0.20   | -0.01   | 0.28*** | 0.59*** | 0.58*** |
|               |        |            | (0.15)  | (0.14)  | (0.14)  | (0.11)  | (0.05)  | (0.06)  | (0.03)  |
| Overweight    | 25,522 |            | 1.18*** | 1.25*** | 1.31*** | 1.42*** | 1.95*** | 2.20*** | 1.87*** |
|               |        |            | (0.26)  | (0.25)  | (0.24)  | (0.20)  | (0.10)  | (0.10)  | (0.06)  |
|               |        | Obs. diff. | 0.03    | 0.05    | -0.03   | 0.08    | 0.15*** | 0.14*** | 0.08*   |
|               |        |            | (0.11)  | (0.11)  | (0.11)  | (0.08)  | (0.04)  | (0.04)  | (0.02)  |
| Obese I       | 13,443 |            | 1.22*** | 1.28*** | 1.35*** | 1.46*** | 2.01*** | 2.27*** | 1.93*** |
|               |        |            | (0.27)  | (0.26)  | (0.25)  | (0.21)  | (0.10)  | (0.11)  | (0.06)  |
|               |        | Obs. diff. | -0.10   | -0.07   | 0.12    | 0.12    | 0.07    | 0.01    | 0.07    |
|               |        |            | (0.16)  | (0.14)  | (0.13)  | (0.11)  | (0.05)  | (0.06)  | (0.03)  |
| Obese II      | 10,510 |            | 1.27*** | 1.34*** | 1.41*** | 1.52*** | 2.09*** | 2.37*** | 2.01*** |
|               |        |            | (0.28)  | (0.27)  | (0.26)  | (0.22)  | (0.11)  | (0.11)  | (0.06)  |
|               |        | Obs. diff. | 2.51*** | 0.08    | 0.49    | 0.29    | -0.07   | 0.11    | 0.26    |
|               |        |            | (0.63)  | (0.62)  | (0.60)  | (0.44)  | (0.22)  | (0.24)  | (0.13)  |
| Obese I & II  | 23,953 |            | 1.24*** | 1.31*** | 1.38*** | 1.49*** | 2.05*** | 2.31*** | 1.97*** |
|               |        |            | (0.27)  | (0.27)  | (0.26)  | (0.21)  | (0.10)  | (0.11)  | (0.06)  |
|               |        | Obs. diff. | 0.61    | 0.30    | -0.29   | 0.17    | 0.21    | 0.43**  | 0.34**  |
|               |        |            | (0.45)  | (0.43)  | (0.40)  | (0.32)  | (0.16)  | (0.17)  | (0.09)  |
| Females 56-64 | 51,485 |            | 1.12*** | 1.04*** | 1.34*** | 0.88*** | 1.80*** | 2.32*** | 2.69*** |
|               |        |            | (0.39)  | (0.29)  | (0.30)  | (0.23)  | (0.11)  | (0.12)  | (0.07)  |
|               |        | Obs. diff. | 0.96**  | 0.54    | 1.05*** | 0.65**  | 1.43*** | 1.71*** | 1.34*** |
|               |        |            | (0.41)  | (0.36)  | (0.35)  | (0.27)  | (0.13)  | (0.14)  | (0.06)  |
| Normal        | 18,846 |            | 1.10*** | 1.02*** | 1.31*** | 0.87*** | 1.75*** | 2.26*** | 2.61*** |
|               |        |            | (0.37)  | (0.28)  | (0.29)  | (0.22)  | (0.11)  | (0.12)  | (0.06)  |
|               |        | Obs. diff. | 0.03    | 0.07    | 0.15    | -0.04   | 0.34*** | 0.42*** | 0.34*** |
|               |        |            | (0.20)  | (0.20)  | (0.20)  | (0.14)  | (0.07)  | (0.08)  | (0.03)  |

|              |        |                   |                   |                   |                   |                   |                   |                   |
|--------------|--------|-------------------|-------------------|-------------------|-------------------|-------------------|-------------------|-------------------|
| Overweight   | 16,744 | 1.12***<br>(0.38) | 1.03***<br>(0.29) | 1.33***<br>(0.29) | 0.87***<br>(0.22) | 1.79***<br>(0.11) | 2.31***<br>(0.12) | 2.67***<br>(0.06) |
| Obs. diff.   |        | -0.23<br>(0.17)   | -0.01<br>(0.13)   | -0.07<br>(0.13)   | -0.04<br>(0.10)   | 0.06<br>(0.05)    | 0.08<br>(0.05)    | 0.02<br>(0.02)    |
| Obese I      | 9,360  | 1.14***<br>(0.40) | 1.05***<br>(0.30) | 1.36***<br>(0.30) | 0.89***<br>(0.23) | 1.84***<br>(0.12) | 2.38***<br>(0.13) | 2.75***<br>(0.07) |
| Obs. diff.   |        | 0.68***<br>(0.22) | -0.16<br>(0.17)   | -0.05<br>(0.19)   | 0.29*<br>(0.15)   | 0.06<br>(0.06)    | 0.18***<br>(0.07) | 0.03<br>(0.03)    |
| Obese II     | 6,535  | 1.18***<br>(0.41) | 1.08***<br>(0.31) | 1.41***<br>(0.32) | 0.92***<br>(0.24) | 1.90***<br>(0.12) | 2.47***<br>(0.13) | 2.86***<br>(0.07) |
| Obs. diff.   |        | 0.68<br>(0.83)    | -1.76<br>(0.92)   | -1.40<br>(0.75)   | 0.09<br>(0.61)    | 0.20<br>(0.28)    | 0.44<br>(0.29)    | 0.56***<br>(0.14) |
| Obese I & II | 15,895 | 1.16***<br>(0.40) | 1.07***<br>(0.30) | 1.38***<br>(0.31) | 0.90***<br>(0.24) | 1.87***<br>(0.12) | 2.41***<br>(0.13) | 2.80***<br>(0.07) |
| Obs. diff.   |        | 1.57***<br>(0.60) | -1.28<br>(0.53)   | -0.11<br>(0.52)   | 0.76*<br>(0.42)   | 0.37**<br>(0.19)  | 0.57***<br>(0.20) | 0.60***<br>(0.10) |

*Note:* Asymptotic standard errors in parentheses. Asterisks indicate levels of significance:

\*\*\*1%, \*\*5%, \*10%.

ATE, Average Treatment Effect.

Normal, BMI < 25; Overweight,  $25 \leq \text{BMI} < 30$ ; Obese I,  $30 \leq \text{BMI} < 35$ ; Obese II,  $\text{BMI} \geq 35$ ; Obese I & II,  $\text{BMI} \geq 30$ .

Table A4: Treatment Effect Estimates of Quitting Smoking on BMI: Males (across BMI Categories and with Observed Differences)

| <i>Sample</i> | <i>Sample size</i> | <i>Time since quitting smoking</i> |                   |                   |                       |                   |                    |                   |
|---------------|--------------------|------------------------------------|-------------------|-------------------|-----------------------|-------------------|--------------------|-------------------|
|               |                    | <i>&lt; 1 mo.</i>                  | <i>1 – 3 mos.</i> | <i>3 – 6 mos.</i> | <i>6 mos. – 1 yr.</i> | <i>1 – 5 yrs.</i> | <i>5 – 10 yrs.</i> | <i>≥ 10 yrs.</i>  |
| Males 18–40   | 43,447             | 0.69***<br>(0.25)                  | 0.95***<br>(0.23) | 0.54***<br>(0.21) | 0.96***<br>(0.18)     | 1.13***<br>(0.09) | 1.02***<br>(0.11)  | 0.76***<br>(0.10) |
| Obs. diff.    |                    | 0.62**<br>(0.25)                   | 0.81***<br>(0.25) | 0.53**<br>(0.23)  | 0.91***<br>(0.19)     | 1.24***<br>(0.09) | 1.30***<br>(0.12)  | 1.24***<br>(0.10) |
| Normal        | 14,639             | 0.68***<br>(0.24)                  | 0.94***<br>(0.23) | 0.54***<br>(0.21) | 0.95***<br>(0.18)     | 1.12***<br>(0.09) | 1.01***<br>(0.11)  | 0.76***<br>(0.10) |
| Obs. diff.    |                    | −0.09<br>(0.15)                    | 0.08<br>(0.16)    | −0.20<br>(0.15)   | −0.01<br>(0.12)       | 0.28***<br>(0.06) | 0.59***<br>(0.08)  | 0.58***<br>(0.07) |
| Overweight    | 18,049             | 0.68***<br>(0.25)                  | 0.95***<br>(0.23) | 0.54**<br>(0.21)  | 0.96***<br>(0.18)     | 1.13***<br>(0.09) | 1.01***<br>(0.11)  | 0.76***<br>(0.10) |
| Obs. diff.    |                    | 0.03<br>(0.11)                     | 0.05<br>(0.11)    | −0.03<br>(0.10)   | 0.08<br>(0.08)        | 0.15***<br>(0.04) | 0.14***<br>(0.05)  | 0.08*<br>(0.04)   |
| Obese I       | 7,291              | 0.69***<br>(0.25)                  | 0.96***<br>(0.24) | 0.55**<br>(0.21)  | 0.97***<br>(0.18)     | 1.15***<br>(0.09) | 1.03***<br>(0.11)  | 0.77***<br>(0.10) |
| Obs. diff.    |                    | −0.10<br>(0.16)                    | −0.07<br>(0.16)   | 0.12<br>(0.13)    | 0.12<br>(0.11)        | 0.07<br>(0.06)    | 0.01<br>(0.07)     | 0.07<br>(0.06)    |
| Obese II      | 3,468              | 0.71***<br>(0.25)                  | 0.98***<br>(0.24) | 0.56***<br>(0.22) | 0.99***<br>(0.18)     | 1.17***<br>(0.10) | 1.05***<br>(0.11)  | 0.79***<br>(0.10) |
| Obs. diff.    |                    | 2.51***<br>(0.81)                  | 0.08<br>(0.73)    | 0.49<br>(0.80)    | 0.29<br>(0.57)        | −0.07<br>(0.27)   | 0.11<br>(0.33)     | 0.26<br>(0.31)    |
| Obese I & II  | 10,759             | 0.70***<br>(0.25)                  | 0.97***<br>(0.24) | 0.55***<br>(0.21) | 0.98***<br>(0.18)     | 1.15***<br>(0.09) | 1.04***<br>(0.11)  | 0.78***<br>(0.10) |
| Obs. diff.    |                    | 0.61<br>(0.43)                     | 0.30<br>(0.42)    | −0.29<br>(0.38)   | 0.17<br>(0.31)        | 0.21<br>(0.15)    | 0.43**<br>(0.19)   | 0.34**<br>(0.17)  |
| Males 41–55   | 65,819             | 0.46*<br>(0.24)                    | 1.33***<br>(0.26) | 1.20***<br>(0.22) | 1.37***<br>(0.18)     | 1.69***<br>(0.09) | 1.84***<br>(0.09)  | 1.64***<br>(0.05) |



|              |        |            |                  |                   |                   |                   |                   |                   |                   |
|--------------|--------|------------|------------------|-------------------|-------------------|-------------------|-------------------|-------------------|-------------------|
|              |        | Obs. diff. | 0.11<br>(0.27)   | 1.41***<br>(0.26) | 1.11***<br>(0.24) | 1.49***<br>(0.19) | 1.55***<br>(0.09) | 1.58***<br>(0.10) | 1.27***<br>(0.05) |
| Normal       | 16,251 |            | 0.46*<br>(0.24)  | 1.31***<br>(0.26) | 1.18***<br>(0.22) | 1.35***<br>(0.18) | 1.67***<br>(0.09) | 1.81***<br>(0.09) | 1.62***<br>(0.05) |
|              |        | Obs. diff. | 0.06<br>(0.18)   | 0.03<br>(0.20)    | 0.27<br>(0.18)    | 0.15<br>(0.14)    | 0.35***<br>(0.07) | 0.48***<br>(0.08) | 0.52***<br>(0.04) |
| Overweight   | 29,701 |            | 0.46*<br>(0.24)  | 1.32***<br>(0.26) | 1.19***<br>(0.22) | 1.37***<br>(0.18) | 1.68***<br>(0.09) | 1.83***<br>(0.09) | 1.64***<br>(0.05) |
|              |        | Obs. diff. | 0.09<br>(0.10)   | 0.27**<br>(0.11)  | 0.22**<br>(0.10)  | 0.19**<br>(0.08)  | 0.19***<br>(0.04) | 0.21***<br>(0.04) | 0.11***<br>(0.02) |
| Obese I      | 13,392 |            | 0.47*<br>(0.24)  | 1.34***<br>(0.27) | 1.21***<br>(0.23) | 1.39***<br>(0.18) | 1.71***<br>(0.09) | 1.86***<br>(0.09) | 1.66***<br>(0.05) |
|              |        | Obs. diff. | 0.08<br>(0.18)   | 0.28**<br>(0.14)  | -0.07<br>(0.14)   | -0.01<br>(0.10)   | 0.06<br>(0.05)    | -0.01<br>(0.05)   | 0.04<br>(0.03)    |
| Obese II     | 6,475  |            | 0.48*<br>(0.25)  | 1.38***<br>(0.27) | 1.24***<br>(0.23) | 1.42***<br>(0.19) | 1.75***<br>(0.09) | 1.90***<br>(0.10) | 1.70***<br>(0.06) |
|              |        | Obs. diff. | -0.44<br>(0.86)  | 0.19<br>(0.67)    | -0.14<br>(0.63)   | 0.78<br>(0.50)    | 0.32<br>(0.23)    | 0.27<br>(0.26)    | 0.10<br>(0.14)    |
| Obese I & II | 19,867 |            | 0.47*<br>(0.25)  | 1.35***<br>(0.27) | 1.22***<br>(0.23) | 1.40***<br>(0.18) | 1.72***<br>(0.09) | 1.87***<br>(0.09) | 1.68***<br>(0.06) |
|              |        | Obs. diff. | 0.10<br>(0.48)   | 0.57<br>(0.38)    | 0.38<br>(0.37)    | 0.29<br>(0.27)    | 0.39***<br>(0.13) | 0.24*<br>(0.14)   | 0.30***<br>(0.08) |
| Males 56–64  | 48,685 |            | 0.73**<br>(0.35) | 0.81***<br>(0.28) | 0.26<br>(0.29)    | 1.00***<br>(0.21) | 1.68***<br>(0.10) | 2.00***<br>(0.11) | 2.03***<br>(0.06) |
|              |        | Obs. diff. | 0.27<br>(0.36)   | 0.45<br>(0.31)    | -0.16<br>(0.31)   | 0.66***<br>(0.23) | 1.27***<br>(0.11) | 1.65***<br>(0.11) | 1.36***<br>(0.05) |
| Normal       | 11,149 |            | 0.71**<br>(0.34) | 0.78***<br>(0.27) | 0.24<br>(0.28)    | 0.97***<br>(0.21) | 1.64***<br>(0.10) | 1.95***<br>(0.11) | 1.98***<br>(0.06) |
|              |        | Obs. diff. | -0.46<br>(0.24)  | 0.00<br>(0.21)    | -0.40<br>(0.21)   | -0.01<br>(0.16)   | 0.26***<br>(0.08) | 0.31***<br>(0.09) | 0.51***<br>(0.04) |

|              |        |                  |                   |                 |                   |                   |                   |                   |
|--------------|--------|------------------|-------------------|-----------------|-------------------|-------------------|-------------------|-------------------|
| Overweight   | 22,235 | 0.74**<br>(0.34) | 0.81***<br>(0.28) | 0.26<br>(0.28)  | 1.00***<br>(0.21) | 1.67***<br>(0.10) | 1.99***<br>(0.11) | 2.03***<br>(0.06) |
| Obs. diff.   |        | 0.06<br>(0.15)   | -0.15<br>(0.13)   | 0.15<br>(0.13)  | 0.17*<br>(0.10)   | 0.23***<br>(0.04) | 0.23***<br>(0.05) | 0.13***<br>(0.02) |
| Obese I      | 10,435 | 0.75**<br>(0.35) | 0.82***<br>(0.28) | 0.27<br>(0.29)  | 1.02***<br>(0.22) | 1.71***<br>(0.11) | 2.03***<br>(0.11) | 2.07***<br>(0.06) |
| Obs. diff.   |        | 0.11<br>(0.22)   | 0.18<br>(0.17)    | 0.07<br>(0.20)  | 0.13<br>(0.14)    | 0.12*<br>(0.06)   | -0.01<br>(0.06)   | 0.03<br>(0.03)    |
| Obese II     | 4,866  | 0.76**<br>(0.36) | 0.84***<br>(0.29) | 0.26<br>(0.30)  | 1.03***<br>(0.22) | 1.74***<br>(0.11) | 2.07***<br>(0.11) | 2.11***<br>(0.06) |
| Obs. diff.   |        | -0.35<br>(0.95)  | -1.05<br>(0.86)   | -1.07<br>(1.00) | 0.15<br>(0.63)    | 0.15<br>(0.27)    | 0.49*<br>(0.28)   | 0.22<br>(0.13)    |
| Obese I & II | 15,301 | 0.75**<br>(0.36) | 0.83***<br>(0.29) | 0.26<br>(0.29)  | 1.02***<br>(0.22) | 1.72***<br>(0.11) | 2.05***<br>(0.11) | 2.08***<br>(0.06) |
| Obs. diff.   |        | 0.23<br>(0.55)   | -0.27<br>(0.45)   | -0.37<br>(0.53) | 0.17<br>(0.35)    | 0.42***<br>(0.16) | 0.34**<br>(0.16)  | 0.35***<br>(0.07) |

*Note:* Asymptotic standard errors in parentheses. Asterisks indicate levels of significance:

\*\*\*1%, \*\*5%, \*10%.

ATE, Average Treatment Effect.

Normal, BMI < 25; Overweight, 25 ≤ BMI < 30; Obese I, 30 ≤ BMI < 35; Obese II, BMI ≥ 35; Obese I & II, BMI ≥ 30.

Table A5: Marginal Effects of Explanatory Variables on Probability of Quitting and Conditional Levels of BMI: Females

| Variable                         | Age 18–40            |                      |                      | Age 41–55            |                      |                      | Age 56–64            |                      |                      |
|----------------------------------|----------------------|----------------------|----------------------|----------------------|----------------------|----------------------|----------------------|----------------------|----------------------|
|                                  | Prob. of<br>Quitting | BMI cond. on         |                      | Prob. of<br>Quitting | BMI cond. on         |                      | Prob. of<br>Quitting | BMI cond. on         |                      |
|                                  |                      | Smoking              | Quitting             |                      | Smoking              | Quitting             |                      | Smoking              | Quitting             |
| Continuous explanatory variables |                      |                      |                      |                      |                      |                      |                      |                      |                      |
| Age / 10                         | 0.038***<br>(0.004)  | 0.703***<br>(0.046)  | 0.715***<br>(0.048)  | 0.114***<br>(0.004)  | -0.128***<br>(0.049) | -0.136***<br>(0.053) | 0.153***<br>(0.008)  | -0.827***<br>(0.093) | -0.785***<br>(0.101) |
| Income / 10                      | 0.014***<br>(0.001)  | -0.187***<br>(0.014) | -0.197***<br>(0.014) | 0.017***<br>(0.001)  | -0.082***<br>(0.010) | -0.093***<br>(0.010) | 0.018***<br>(0.001)  | -0.047***<br>(0.013) | -0.043***<br>(0.014) |
| Adults                           | -0.020***<br>(0.003) | 0.223***<br>(0.037)  | 0.235***<br>(0.038)  | -0.018***<br>(0.002) | 0.289***<br>(0.028)  | 0.309***<br>(0.030)  | -0.014***<br>(0.004) | 0.257***<br>(0.043)  | 0.270***<br>(0.047)  |
| Childs                           | 0.002<br>(0.002)     | 0.004<br>(0.021)     | 0.004<br>(0.021)     | 0.027***<br>(0.002)  | -0.010<br>(0.021)    | -0.009<br>(0.022)    | -0.012***<br>(0.004) | 0.316***<br>(0.052)  | 0.336***<br>(0.057)  |
| Binary explanatory variables     |                      |                      |                      |                      |                      |                      |                      |                      |                      |
| Health                           | 0.133***<br>(0.006)  | -2.716***<br>(0.063) | -2.819***<br>(0.066) | 0.132***<br>(0.005)  | -3.054***<br>(0.051) | -3.242***<br>(0.055) | 0.082***<br>(0.006)  | -2.769***<br>(0.062) | -2.948***<br>(0.067) |
| Health very                      | 0.055***<br>(0.005)  | -1.253***<br>(0.059) | -1.304***<br>(0.061) | 0.052***<br>(0.004)  | -1.339***<br>(0.047) | -1.429***<br>(0.051) | 0.032***<br>(0.005)  | -1.212***<br>(0.057) | -1.297***<br>(0.062) |
| Health fair-poor                 | -0.030***<br>(0.007) | 0.755***<br>(0.096)  | 0.787***<br>(0.099)  | -0.013**<br>(0.005)  | 0.745***<br>(0.065)  | 0.796***<br>(0.070)  | -0.015***<br>(0.006) | 0.580***<br>(0.073)  | 0.621***<br>(0.079)  |
| White                            | 0.032***<br>(0.008)  | -2.606***<br>(0.110) | -2.699***<br>(0.114) | 0.005<br>(0.006)     | -2.297***<br>(0.082) | -2.456***<br>(0.088) | -0.011<br>(0.008)    | -1.552***<br>(0.102) | -1.700***<br>(0.111) |
| Other race                       | 0.057***<br>(0.010)  | -1.600***<br>(0.116) | -1.661***<br>(0.120) | 0.005<br>(0.008)     | -1.528***<br>(0.095) | -1.634***<br>(0.101) | -0.029***<br>(0.011) | -1.168***<br>(0.124) | -1.291***<br>(0.135) |
| High school                      | -0.074***<br>(0.005) | -0.219***<br>(0.058) | -0.210***<br>(0.060) | -0.056***<br>(0.004) | -0.114**<br>(0.046)  | -0.121**<br>(0.050)  | -0.044***<br>(0.005) | 0.003<br>(0.058)     | -0.027<br>(0.063)    |
| College or more                  | 0.115***<br>(0.006)  | -0.877***<br>(0.062) | -0.922***<br>(0.064) | 0.106***<br>(0.004)  | -0.724***<br>(0.049) | -0.763***<br>(0.052) | 0.086***<br>(0.005)  | -0.699***<br>(0.060) | -0.691***<br>(0.065) |
| Married                          | 0.125***<br>(0.005)  | 0.230***<br>(0.059)  | 0.212***<br>(0.062)  | 0.089***<br>(0.004)  | -0.231***<br>(0.050) | -0.248***<br>(0.053) | 0.087***<br>(0.006)  | -0.433***<br>(0.062) | -0.409***<br>(0.068) |
| Employed                         | -0.023***<br>(0.004) | 0.303***<br>(0.054)  | 0.318***<br>(0.056)  | 0.025***<br>(0.004)  | 0.293***<br>(0.047)  | 0.313***<br>(0.050)  | 0.003<br>(0.005)     | 0.055<br>(0.050)     | 0.061<br>(0.054)     |

|                 |                      |                     |                     |                      |                     |                     |                      |                     |                     |
|-----------------|----------------------|---------------------|---------------------|----------------------|---------------------|---------------------|----------------------|---------------------|---------------------|
| Health          | 0.040***<br>(0.005)  | 0.436***<br>(0.063) | 0.441***<br>(0.065) | 0.058***<br>(0.005)  | 0.428***<br>(0.057) | 0.453***<br>(0.061) | 0.085***<br>(0.007)  | 0.311***<br>(0.074) | 0.384***<br>(0.081) |
| Diabetes        | 0.048***<br>(0.012)  | 4.091***<br>(0.195) | 4.216***<br>(0.201) | 0.082***<br>(0.006)  | 4.508***<br>(0.097) | 4.834***<br>(0.103) | 0.087***<br>(0.006)  | 4.054***<br>(0.085) | 4.508***<br>(0.092) |
| Year 2005       | 0.015***<br>(0.005)  | 0.150**<br>(0.059)  | 0.152**<br>(0.061)  | 0.009**<br>(0.004)   | 0.263***<br>(0.051) | 0.281***<br>(0.055) | 0.015**<br>(0.006)   | 0.156**<br>(0.068)  | 0.181**<br>(0.074)  |
| Year 2009       | 0.047***<br>(0.006)  | 0.833***<br>(0.070) | 0.851***<br>(0.073) | 0.017***<br>(0.005)  | 0.671***<br>(0.056) | 0.718***<br>(0.060) | 0.015**<br>(0.006)   | 0.439***<br>(0.071) | 0.490***<br>(0.078) |
| Year 2010       | 0.046***<br>(0.007)  | 1.059***<br>(0.089) | 1.086***<br>(0.092) | 0.019***<br>(0.006)  | 0.664***<br>(0.067) | 0.710***<br>(0.072) | 0.013*<br>(0.007)    | 0.376***<br>(0.082) | 0.419***<br>(0.089) |
| So. Atlantic    | -0.086***<br>(0.008) | 0.070***<br>(0.009) | 0.095***<br>(0.013) | -0.064***<br>(0.007) | 0.119***<br>(0.013) | 0.132***<br>(0.015) | -0.040***<br>(0.009) | 0.108***<br>(0.024) | 0.092***<br>(0.021) |
| E. So. Central  | -0.122***<br>(0.009) | 0.099***<br>(0.011) | 0.142***<br>(0.017) | -0.103***<br>(0.008) | 0.187***<br>(0.016) | 0.217***<br>(0.020) | -0.065***<br>(0.011) | 0.172***<br>(0.028) | 0.150***<br>(0.026) |
| W. So. Central  | -0.099***<br>(0.009) | 0.080***<br>(0.010) | 0.112***<br>(0.014) | -0.102***<br>(0.008) | 0.186***<br>(0.015) | 0.215***<br>(0.019) | -0.064***<br>(0.010) | 0.169***<br>(0.026) | 0.148***<br>(0.024) |
| New England     | -0.034***<br>(0.008) | 0.028***<br>(0.007) | 0.037***<br>(0.009) | -0.001<br>(0.007)    | 0.002<br>(0.013)    | 0.002<br>(0.014)    | 0.011<br>(0.008)     | -0.031<br>(0.024)   | -0.025<br>(0.019)   |
| Middle Atlantic | -0.078***<br>(0.008) | 0.063***<br>(0.009) | 0.087***<br>(0.013) | -0.068***<br>(0.007) | 0.125***<br>(0.014) | 0.141***<br>(0.017) | -0.050***<br>(0.010) | 0.136***<br>(0.026) | 0.117***<br>(0.023) |
| E. No. Central  | -0.093***<br>(0.008) | 0.075***<br>(0.009) | 0.105***<br>(0.013) | -0.075***<br>(0.007) | 0.138***<br>(0.013) | 0.155***<br>(0.016) | -0.038***<br>(0.009) | 0.102***<br>(0.025) | 0.087***<br>(0.022) |
| W. No. Central  | -0.077***<br>(0.008) | 0.064***<br>(0.009) | 0.082***<br>(0.012) | -0.069***<br>(0.007) | 0.130***<br>(0.014) | 0.138***<br>(0.015) | -0.041***<br>(0.009) | 0.112***<br>(0.025) | 0.093***<br>(0.020) |
| Mountain        | -0.027***<br>(0.008) | 0.022***<br>(0.007) | 0.029***<br>(0.009) | -0.040***<br>(0.007) | 0.074***<br>(0.013) | 0.082***<br>(0.015) | -0.026***<br>(0.009) | 0.072***<br>(0.024) | 0.061***<br>(0.020) |

*Note:* Asymptotic standard errors in parentheses. Marginal effects of the numbers of adults and children are calculated as the effects of an increase of one from the observed value for each sample observation, averaged over the sample. Results are very similar to those obtained with differentiation. Asterisks indicate levels of significance:

\*\*\*1%, \*\*5%, \*10%.

Table A6: Marginal Effects of Explanatory Variables on Probability of Quitting and Conditional Levels of BMI: Males

| Variable                         | Age 18–40            |                      |                      | Age 41–55            |                      |                      | Age 56–64            |                      |                      |
|----------------------------------|----------------------|----------------------|----------------------|----------------------|----------------------|----------------------|----------------------|----------------------|----------------------|
|                                  | Prob. of<br>Quitting | BMI cond. on         |                      | Prob. of<br>Quitting | BMI cond. on         |                      | Prob. of<br>Quitting | BMI cond. on         |                      |
|                                  |                      | Smoking              | Quitting             |                      | Smoking              | Quitting             |                      | Smoking              | Quitting             |
| Continuous explanatory variables |                      |                      |                      |                      |                      |                      |                      |                      |                      |
| Age / 10                         | 0.044***<br>(0.004)  | 0.802***<br>(0.045)  | 0.818***<br>(0.046)  | 0.103***<br>(0.005)  | -0.362***<br>(0.048) | -0.363***<br>(0.050) | 0.135***<br>(0.008)  | -0.746***<br>(0.081) | -0.683***<br>(0.086) |
| Income / 10                      | 0.010***<br>(0.001)  | 0.078***<br>(0.011)  | 0.078***<br>(0.011)  | 0.015***<br>(0.001)  | 0.099***<br>(0.008)  | 0.103***<br>(0.008)  | 0.017***<br>(0.001)  | 0.095***<br>(0.009)  | 0.107***<br>(0.009)  |
| Adults                           | -0.019***<br>(0.003) | 0.022<br>(0.033)     | 0.026<br>(0.034)     | -0.010***<br>(0.003) | 0.146***<br>(0.026)  | 0.153***<br>(0.028)  | -0.014***<br>(0.004) | 0.077**<br>(0.037)   | 0.071*<br>(0.039)    |
| Childs                           | 0.003<br>(0.002)     | 0.114***<br>(0.021)  | 0.117***<br>(0.021)  | 0.014***<br>(0.002)  | -0.030<br>(0.019)    | -0.030<br>(0.020)    | -0.002<br>(0.004)    | -0.082**<br>(0.042)  | -0.088**<br>(0.044)  |
| Binary explanatory variables     |                      |                      |                      |                      |                      |                      |                      |                      |                      |
| Health                           | 0.091***<br>(0.006)  | -1.718***<br>(0.059) | -1.779***<br>(0.061) | 0.103***<br>(0.006)  | -1.897***<br>(0.049) | -1.976***<br>(0.052) | 0.086***<br>(0.006)  | -1.770***<br>(0.056) | -1.799***<br>(0.059) |
| Health very                      | 0.038***<br>(0.005)  | -0.959***<br>(0.054) | -0.993***<br>(0.056) | 0.041***<br>(0.005)  | -0.957***<br>(0.042) | -1.003***<br>(0.044) | 0.038***<br>(0.005)  | -0.781***<br>(0.048) | -0.798***<br>(0.051) |
| Health fair-poor                 | -0.019**<br>(0.008)  | 0.522***<br>(0.098)  | 0.540***<br>(0.101)  | -0.019***<br>(0.006) | 0.509***<br>(0.064)  | 0.535***<br>(0.067)  | -0.027***<br>(0.006) | 0.351***<br>(0.062)  | 0.352***<br>(0.066)  |
| White                            | 0.083***<br>(0.010)  | -0.694***<br>(0.109) | -0.731***<br>(0.113) | 0.040***<br>(0.008)  | -0.302***<br>(0.082) | -0.314***<br>(0.087) | 0.032***<br>(0.009)  | 0.295***<br>(0.096)  | 0.336***<br>(0.102)  |
| Other race                       | 0.093***<br>(0.012)  | -0.070<br>(0.119)    | -0.081<br>(0.123)    | 0.038***<br>(0.009)  | -0.263***<br>(0.097) | -0.270***<br>(0.102) | 0.021**<br>(0.010)   | 0.208*<br>(0.122)    | 0.238*<br>(0.130)    |
| High school                      | -0.066***<br>(0.006) | -0.142**<br>(0.055)  | -0.136**<br>(0.057)  | -0.026***<br>(0.005) | -0.035<br>(0.044)    | -0.040<br>(0.047)    | -0.019***<br>(0.005) | 0.011<br>(0.052)     | -0.002<br>(0.055)    |
| College or more                  | 0.094***<br>(0.007)  | -0.625***<br>(0.061) | -0.654***<br>(0.063) | 0.084***<br>(0.005)  | -0.581***<br>(0.047) | -0.596***<br>(0.050) | 0.059***<br>(0.005)  | -0.528***<br>(0.052) | -0.512***<br>(0.055) |
| Married                          | 0.138***<br>(0.006)  | 0.476***<br>(0.056)  | 0.469***<br>(0.057)  | 0.125***<br>(0.005)  | 0.379***<br>(0.048)  | 0.412***<br>(0.050)  | 0.124***<br>(0.006)  | 0.228***<br>(0.058)  | 0.322***<br>(0.061)  |
| Employed                         | 0.031***<br>(0.007)  | -0.200***<br>(0.071) | -0.212***<br>(0.073) | 0.022***<br>(0.005)  | -0.192***<br>(0.057) | -0.199***<br>(0.060) | 0.000<br>(0.005)     | -0.202***<br>(0.045) | -0.214***<br>(0.048) |

|                 |                      |                     |                     |                      |                     |                     |                     |                     |                     |
|-----------------|----------------------|---------------------|---------------------|----------------------|---------------------|---------------------|---------------------|---------------------|---------------------|
| Health          | 0.051***<br>(0.006)  | 0.402***<br>(0.058) | 0.405***<br>(0.060) | 0.064***<br>(0.005)  | 0.288***<br>(0.054) | 0.308***<br>(0.057) | 0.054***<br>(0.007) | 0.274***<br>(0.068) | 0.326***<br>(0.072) |
| Diabetes        | 0.048***<br>(0.015)  | 2.746***<br>(0.212) | 2.822***<br>(0.218) | 0.097***<br>(0.006)  | 3.248***<br>(0.085) | 3.455***<br>(0.090) | 0.085***<br>(0.005) | 2.895***<br>(0.067) | 3.154***<br>(0.070) |
| Year 2005       | 0.024***<br>(0.006)  | 0.032<br>(0.056)    | 0.030<br>(0.057)    | 0.002<br>(0.005)     | 0.191***<br>(0.047) | 0.202***<br>(0.050) | -0.007<br>(0.006)   | 0.121**<br>(0.058)  | 0.123**<br>(0.061)  |
| Year 2009       | 0.061***<br>(0.007)  | 0.455***<br>(0.066) | 0.461***<br>(0.068) | 0.025***<br>(0.005)  | 0.412***<br>(0.053) | 0.439***<br>(0.056) | -0.003<br>(0.006)   | 0.221***<br>(0.062) | 0.232***<br>(0.066) |
| Year 2010       | 0.052***<br>(0.008)  | 0.510***<br>(0.083) | 0.519***<br>(0.086) | 0.032***<br>(0.006)  | 0.557***<br>(0.064) | 0.593***<br>(0.068) | -0.005<br>(0.007)   | 0.161**<br>(0.071)  | 0.167**<br>(0.075)  |
| So. Atlantic    | -0.067***<br>(0.009) | 0.052***<br>(0.008) | 0.067***<br>(0.011) | -0.059***<br>(0.008) | 0.094***<br>(0.013) | 0.094***<br>(0.013) |                     |                     |                     |
| E. So. Central  | -0.094***<br>(0.011) | 0.072***<br>(0.010) | 0.096***<br>(0.015) | -0.067***<br>(0.010) | 0.105***<br>(0.015) | 0.107***<br>(0.017) |                     |                     |                     |
| W. So. Central  | -0.077***<br>(0.010) | 0.059***<br>(0.009) | 0.077***<br>(0.012) | -0.065***<br>(0.009) | 0.102***<br>(0.014) | 0.104***<br>(0.015) |                     |                     |                     |
| New England     | -0.042***<br>(0.009) | 0.033***<br>(0.007) | 0.041***<br>(0.010) | -0.016**<br>(0.008)  | 0.026**<br>(0.012)  | 0.025**<br>(0.012)  |                     |                     |                     |
| Middle Atlantic | -0.081***<br>(0.010) | 0.062***<br>(0.009) | 0.082***<br>(0.013) | -0.046***<br>(0.009) | 0.073***<br>(0.014) | 0.073***<br>(0.014) |                     |                     |                     |
| E. No. Central  | -0.084***<br>(0.009) | 0.065***<br>(0.009) | 0.085***<br>(0.012) | -0.071***<br>(0.008) | 0.112***<br>(0.013) | 0.114***<br>(0.014) |                     |                     |                     |
| W. No. Central  | -0.060***<br>(0.010) | 0.047***<br>(0.008) | 0.057***<br>(0.010) | -0.056***<br>(0.008) | 0.090***<br>(0.013) | 0.087***<br>(0.013) |                     |                     |                     |
| Mountain        | -0.016*<br>(0.009)   | 0.013*<br>(0.007)   | 0.016*<br>(0.009)   | -0.024***<br>(0.008) | 0.039***<br>(0.012) | 0.038***<br>(0.013) |                     |                     |                     |

*Note:* Asymptotic standard errors in parentheses. Marginal effects of the numbers of adults and children are calculated as the effects of an increase of one from the observed value for each sample observation, averaged over the sample. Results are very similar to those obtained with differentiation. Asterisks indicate levels of significance:

\*\*\*1%, \*\*5%, \*10%.

Figure A1: Effects of Quitting Smoking on BMI across BMI Categories: Females 18–40

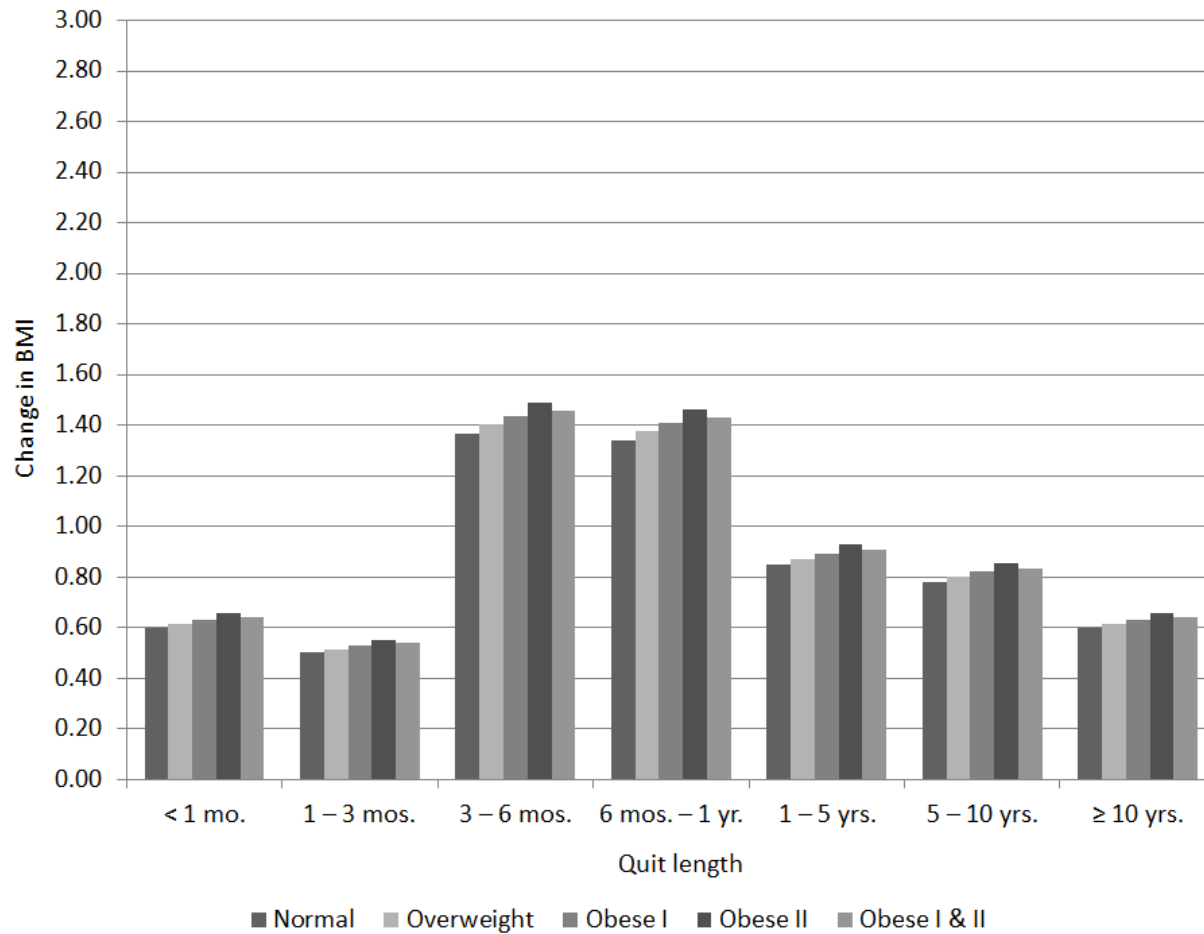

Figure A2: Effects of Quitting Smoking on BMI across BMI Categories: Females 41–55

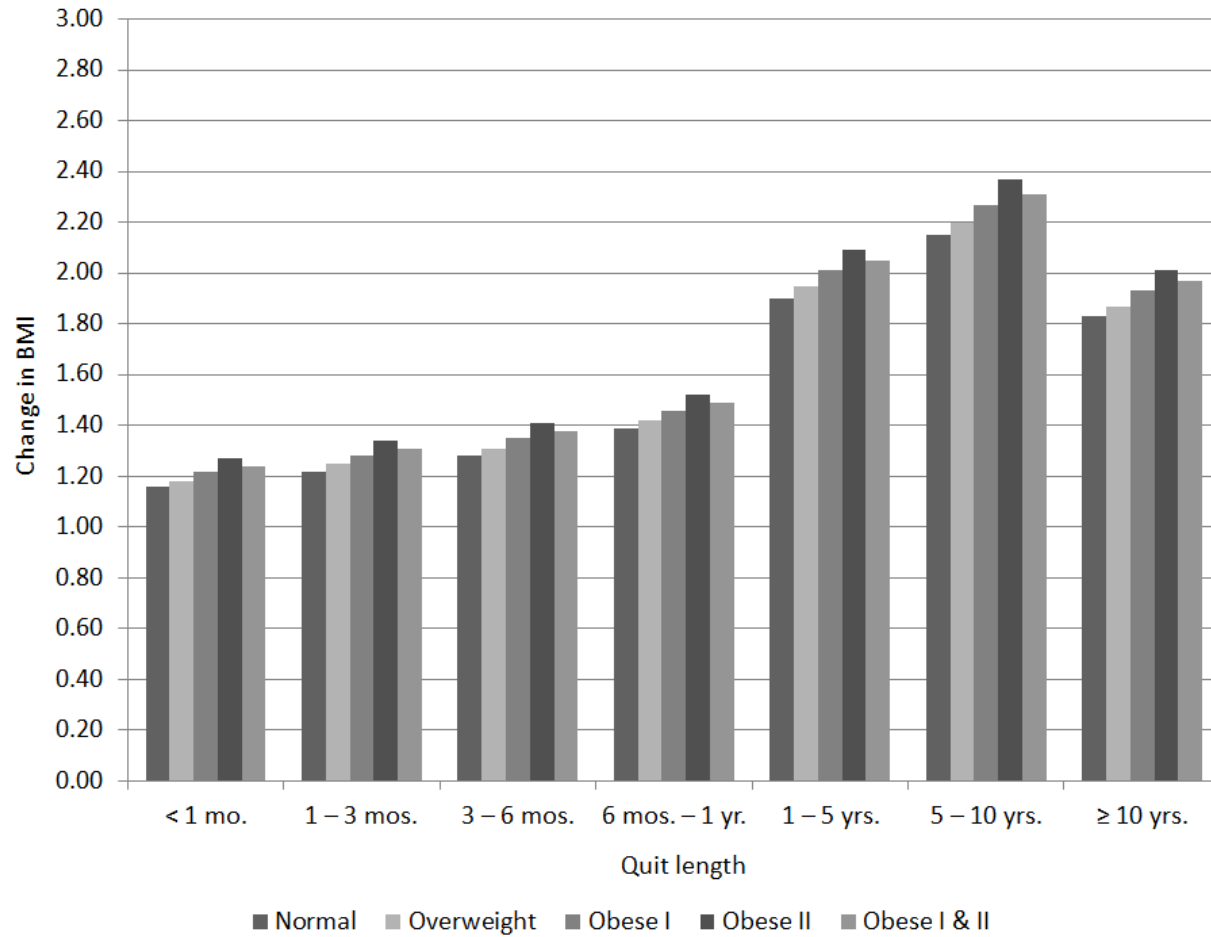



Figure A3: Effects of Quitting Smoking on BMI across BMI Categories: Females 56–64

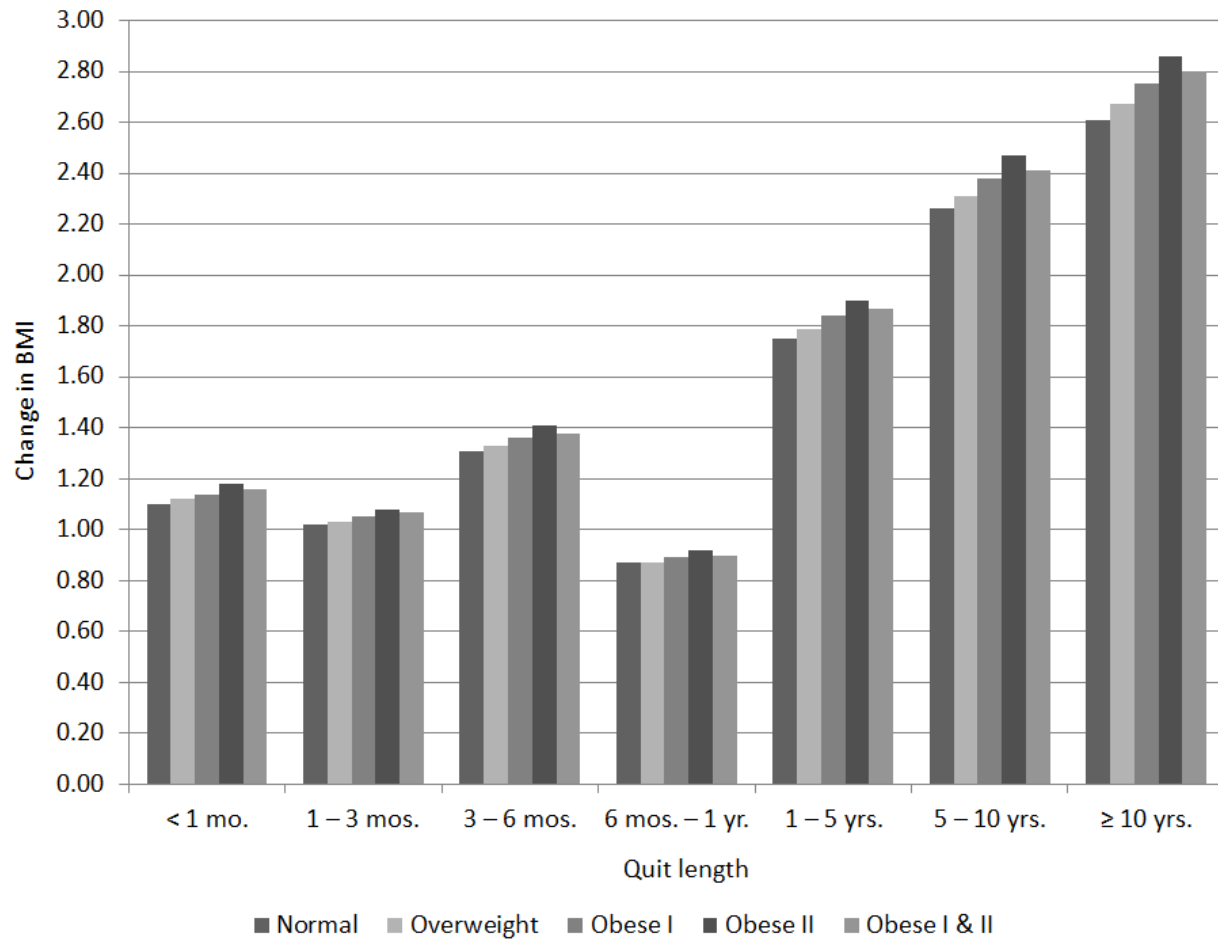

Figure A4: Effects of Quitting Smoking on BMI across BMI Categories: Males 18–40

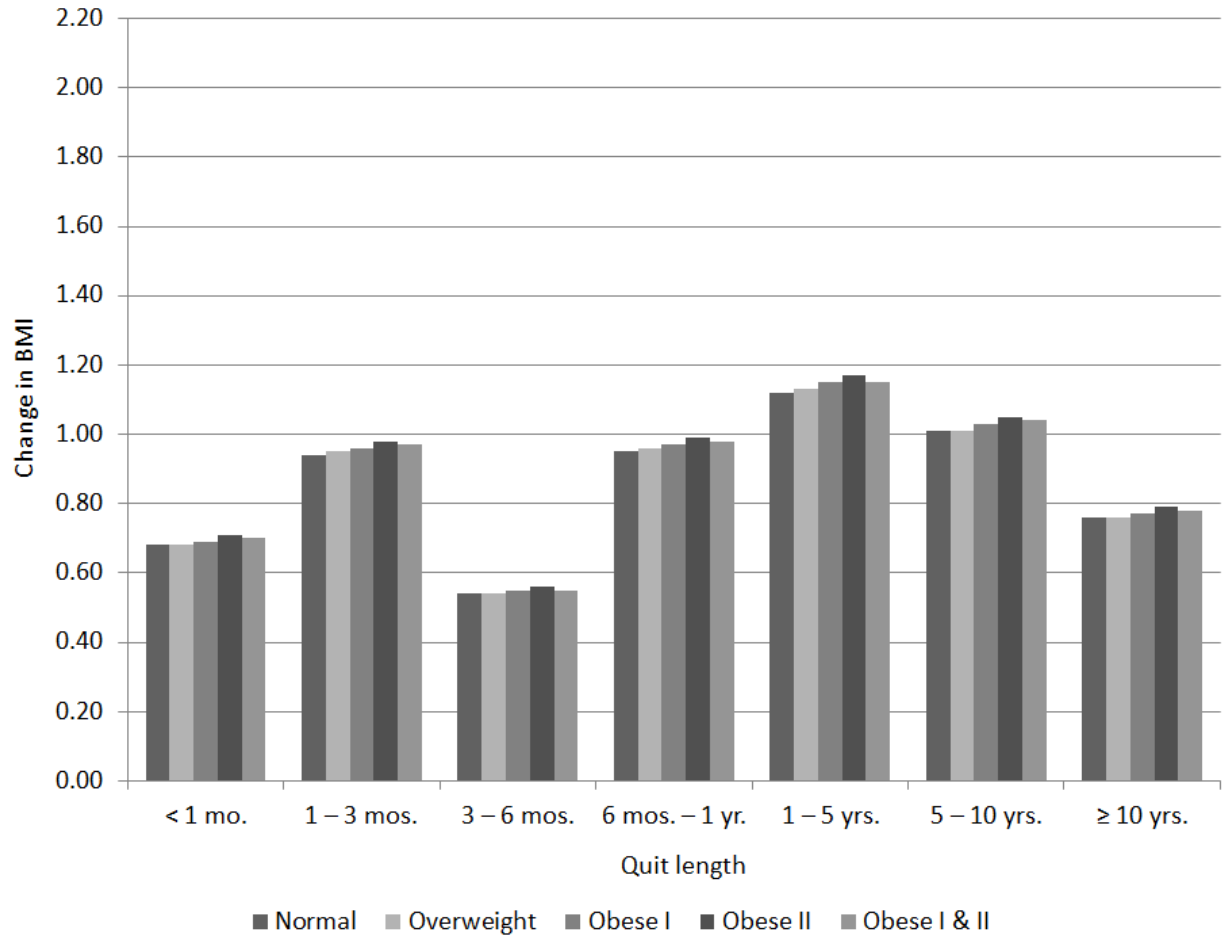

Figure A5: Effects of Quitting Smoking on BMI across BMI Categories: Males 41–55

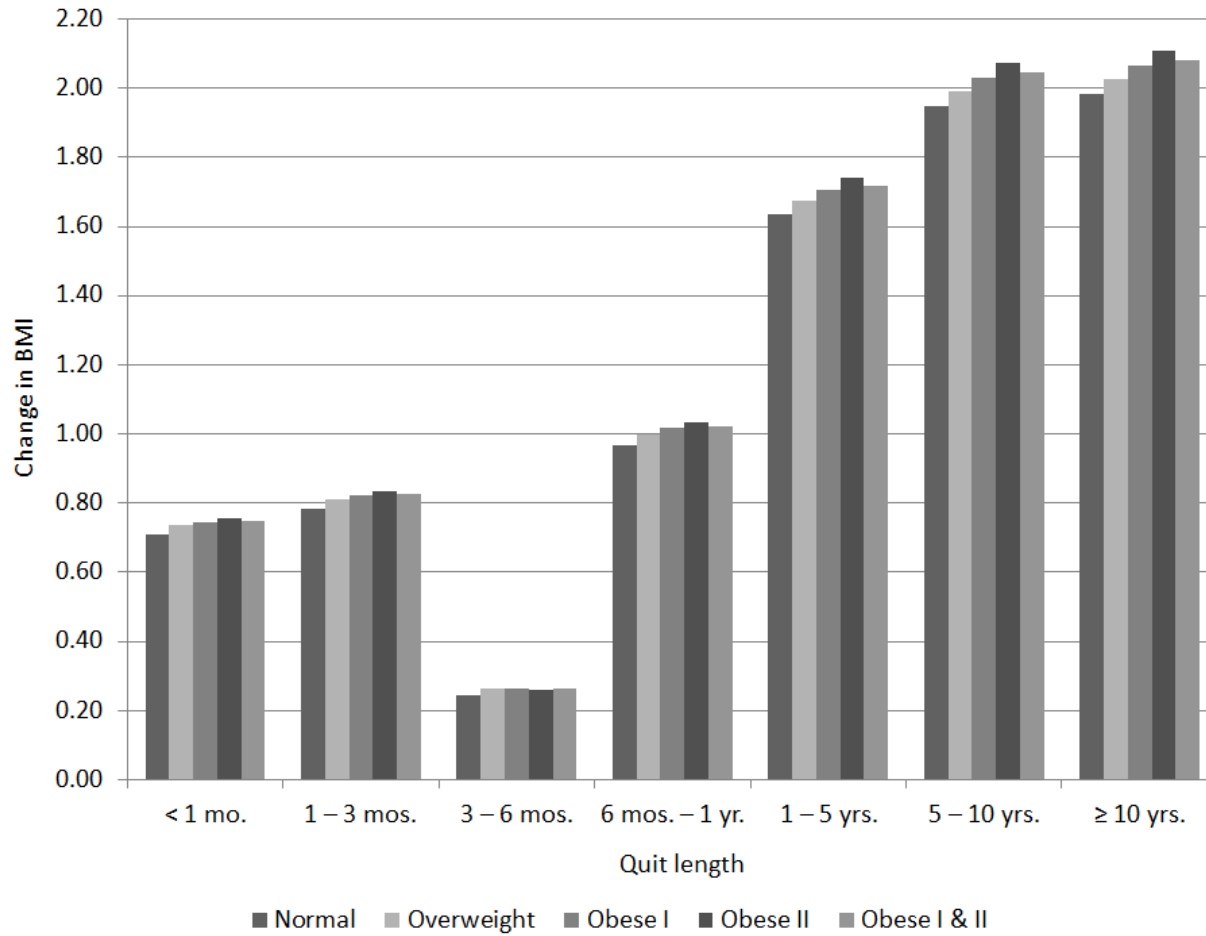

Figure A6: Effects of Quitting Smoking on BMI across BMI Categories: Males 56–64

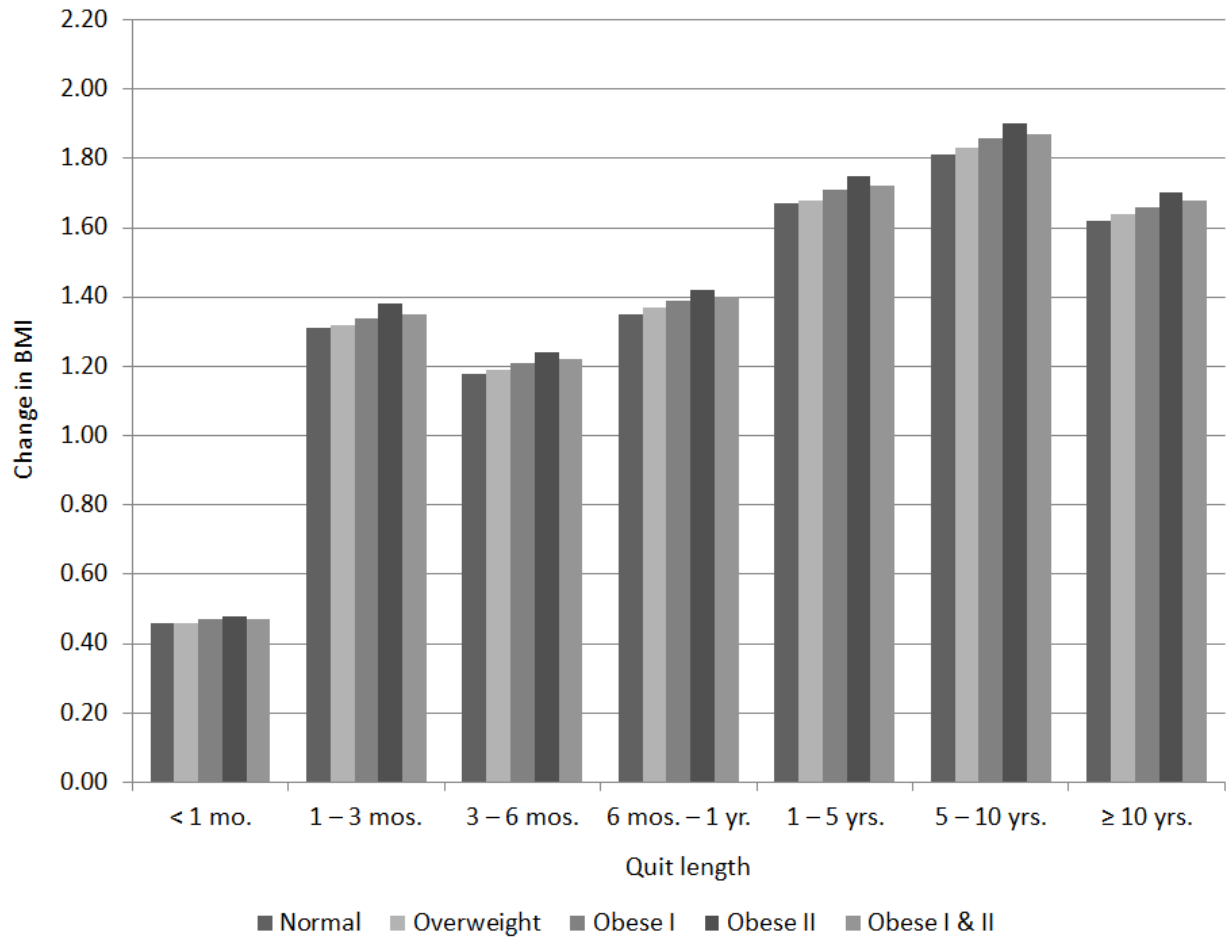

Supplement: hesr0047-1580-SD2.pdf [file hesr0047-1580-SD2.pdf]
